# Supplementary material for: Hetero-structured Fe–Cr–O hollow multishelled spheres for stable sodium storage
Source: Royal Society of Chemistry journal article supplement (doi:10.1039/d2qm00295g), 2022-01-01
Supplement: d2qm00295g1.pdf [file d2qm00295g1.pdf]

## Supporting Information

### Hetero-Structured Fe-Cr-O Hollow Multishelled Spheres for Stable Sodium Storage

Ruhan He<sup>1,2†</sup>, Shidong Li<sup>1†</sup>, Haoyun Liu<sup>1</sup>, Liang Zhou<sup>1,3\*</sup>

<sup>1</sup> *State Key Laboratory of Advanced Technology for Materials Synthesis and Processing, Wuhan University of Technology, Wuhan 430070, P. R. China*

<sup>2</sup> *International School of Materials Science and Engineering, Wuhan University of Technology, Wuhan 430070, P. R. China*

<sup>3</sup> *Shenzhen Institute of Wuhan University of Technology, Shenzhen 518000, P. R. China*

\*Corresponding author.

*E-mail:* liangzhou@whut.edu.cn (Prof. L. Zhou)

## Experimental Section

### *Sample Synthesis*

The spray drying method is applied to synthesized metal salts/sucrose composite microspheres. Iron (III) citrate ( $\text{FeC}_6\text{H}_5\text{O}_7$ ), chromium (III) nitrate nonahydrate ( $\text{Cr}(\text{NO}_3)_3 \cdot 9\text{H}_2\text{O}$ ) with different molar ratios (4:0, 3:1, 2:2, 1:3, 0:4) are added into 100 mL 0.1 M sucrose solutions and stirred overnight. The metal salts/sucrose solution is pumped into the spray drying machine with a pump rate of 5% and an inlet temperature of 220 °C. The colors of collected powder vary from red to green. The Fe-Cr-O HoMS are obtained after the following calcination in air under 400 °C for 2h at a ramp rate of 2 °C min<sup>-1</sup>.

### *Structural and Morphological Characterization*

The crystallographic structure information was collected on a Bruker D8 Advance X-ray diffractometer equipped with a Cu K $\alpha$  radiation source ( $\lambda = 0.15418$  nm). The microstructure information was obtained using a JEOL-7100F field emission SEM at 15 kV and a JEM-2100F TEM at 200 kV. EDS was collected by an Oxford IE250 system. XPS analysis was carried on a VG Multi Lab 2000. Thermo gravimetric

analysis was performed using a Netzsch STA 449 simultaneous analyzer. Brunauer–Emmett–Teller surface areas were calculated from nitrogen sorption isotherms measured at 77 K using a Tristar II 3020 instrument.

### ***Electrode Fabrication and Electrochemical Measurements***

To conduct the electrochemical measurements, 2016 coin cells were assembled in a glove box filled with pure Ar gas. The working electrodes were prepared by mixing 70% active material, 20% acetylene black, and 10% carboxyl methyl cellulose binder, and spreading the slurry onto a copper foil. The electrodes were cut into small wafers with a diameter of 1.0 cm. Na discs were used as both the counter and reference electrodes. The electrolyte was composed of 1.0 M NaClO<sub>4</sub> dissolved in a mixture of ethylene carbonate/dimethyl carbonate (1:1 w/w) with 5% fluoroethylene carbonate, and a Whatman glass microfiber filter (Grade GF/A) was used as the separator. Galvanostatic charge/discharge measurements were performed with a multi-channel battery testing system (LAND CT2001A). CV and EIS were recorded with an electrochemical workstation (Bio-Logic VMP3).

**Table S1.** The preparation parameters for the synthesis of Fe-Cr-O HoMS with different Fe/Cr molar ratios.

| Samples                                          | Chromic nitrate nonahydrate (mmol) | Iron citrate (mmol) | Sucrose (mmol) | Deionized water (mL) |
|--------------------------------------------------|------------------------------------|---------------------|----------------|----------------------|
| Fe-Cr-O-4/0<br>or Fe <sub>2</sub> O <sub>3</sub> | 0                                  | 10                  | 10             | 100                  |
| Fe-Cr-O-3/1                                      | 2.5                                | 7.5                 | 10             | 100                  |
| Fe-Cr-O-2/2                                      | 5                                  | 5                   | 10             | 100                  |
| Fe-Cr-O-1/3                                      | 7.5                                | 2.5                 | 10             | 100                  |
| Fe-Cr-O-0/4<br>or Cr <sub>2</sub> O <sub>3</sub> | 10                                 | 0                   | 10             | 100                  |

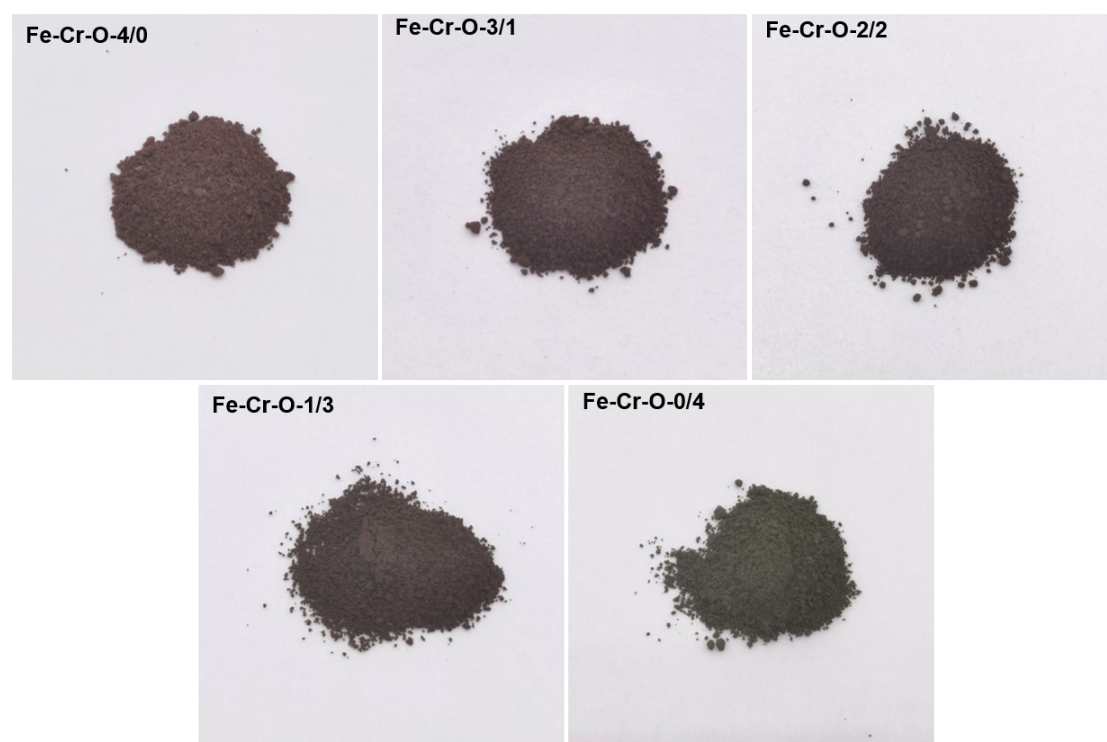

**Figure S1.** Digital photos showing the color of Fe-Cr-O HoMS with different Fe/Cr molar ratios.

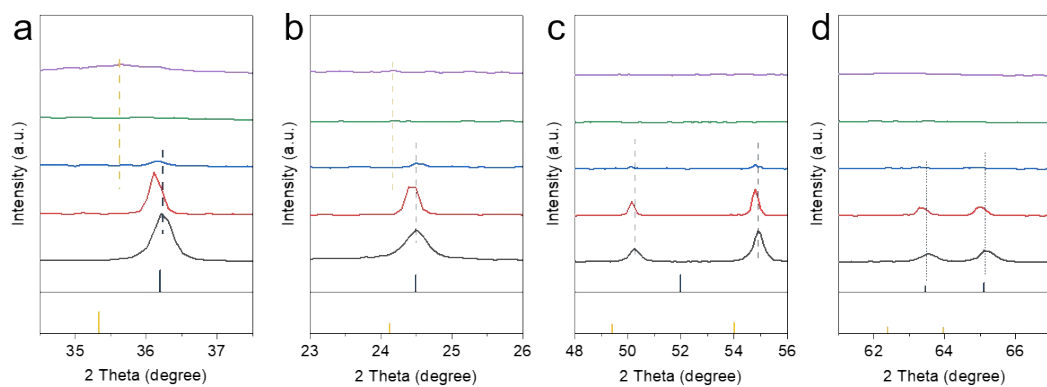

**Figure S2.** Magnified XRD patterns of the Fe-Cr-O HoMS with various Fe/Cr molar ratios.

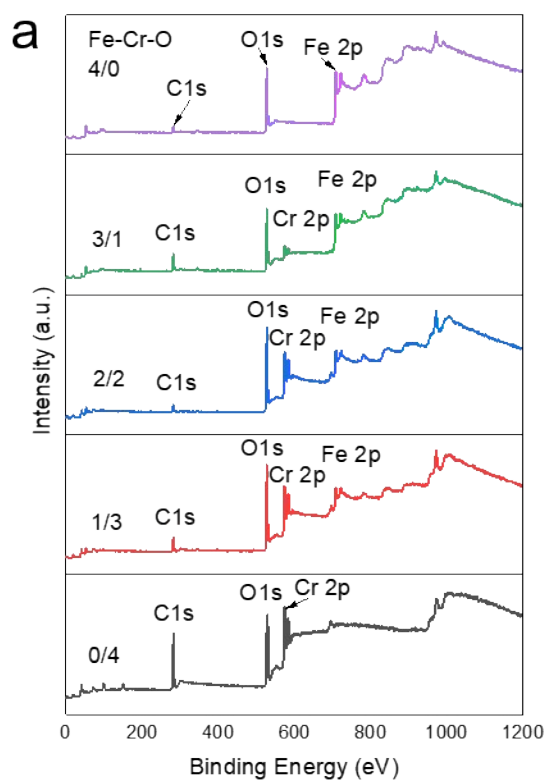

**Figure S3.** XPS survey spectra of the Fe-Cr-O HoMS with the variation of Fe/Cr molar ratio.

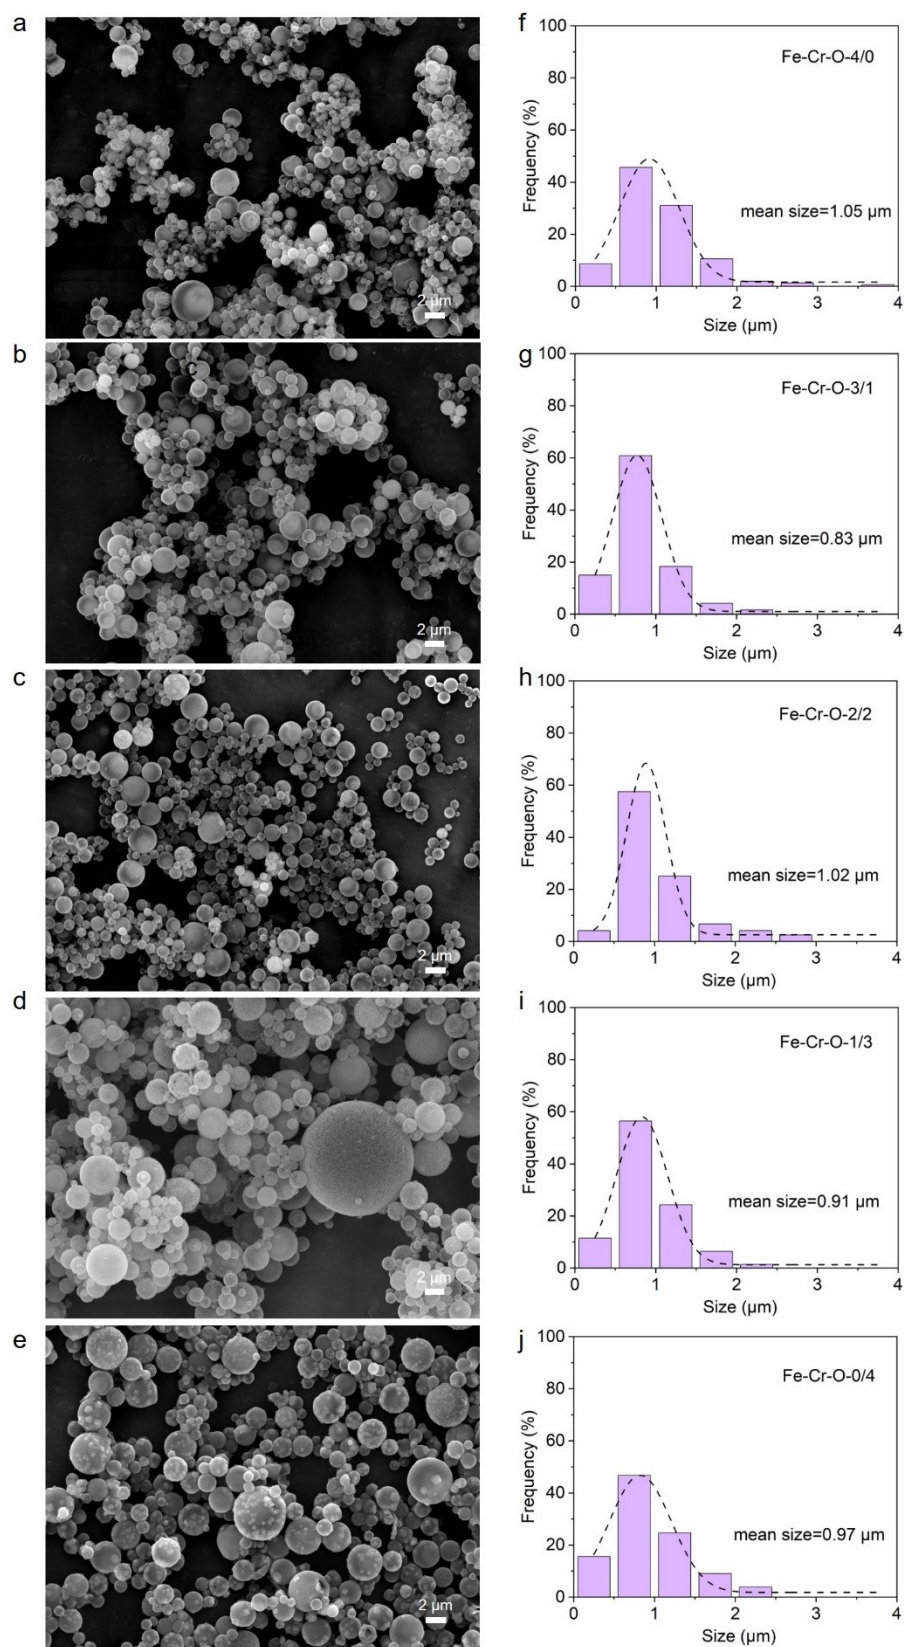

**Figure S4.** (a)-(e) The SEM images of the Fe-Cr-O HoMS and (f)-(j) the corresponding particle size distribution histograms (100 particles total for each sample).

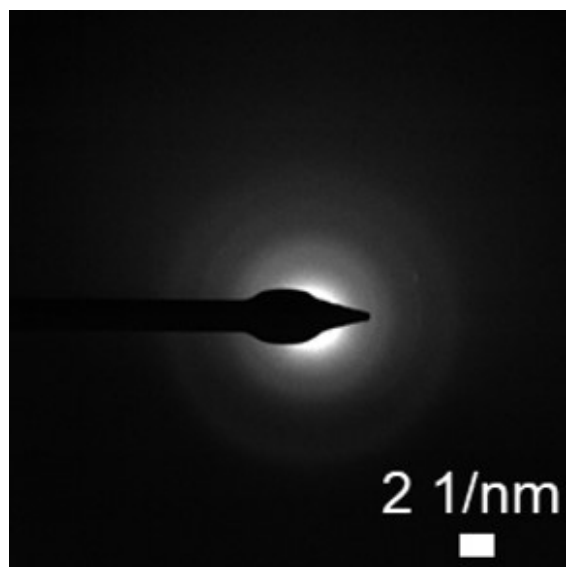

**Figure S5.** SAED patterns of Fe-Cr-O-3/1.

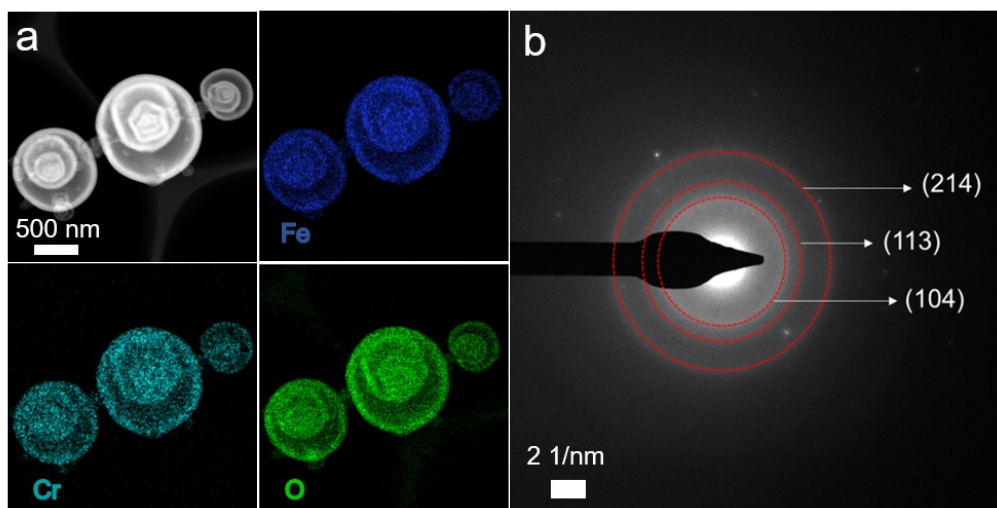

**Figure S6.** (a) HAADF-STEM images and EDS elemental mappings, (b) SAED patterns of Fe-Cr-O-2/2.

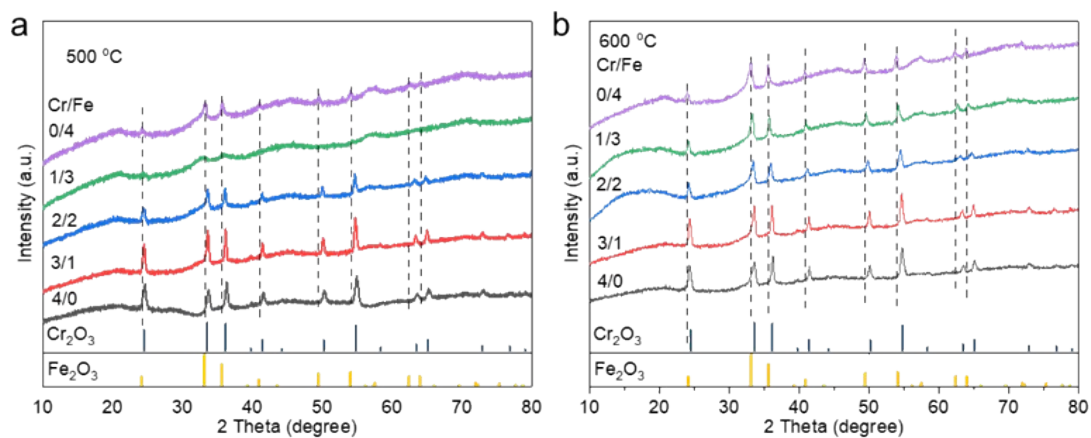

**Figure S7.** XRD patterns of the Fe-Cr-O HoMS prepared at (a) 500 °C, (b) 600 °C.

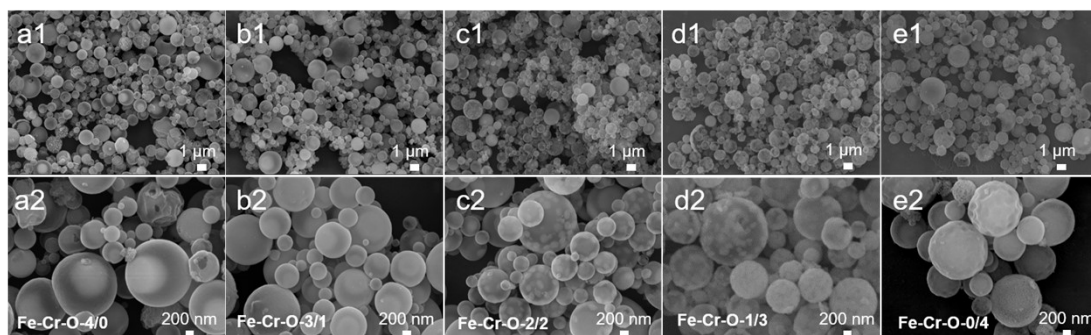

**Figure S8.** SEM images of the Fe-Cr-O HoMS prepared at 500 °C with the variation of Fe/Cr molar ratio from 4/0 to 0/4.

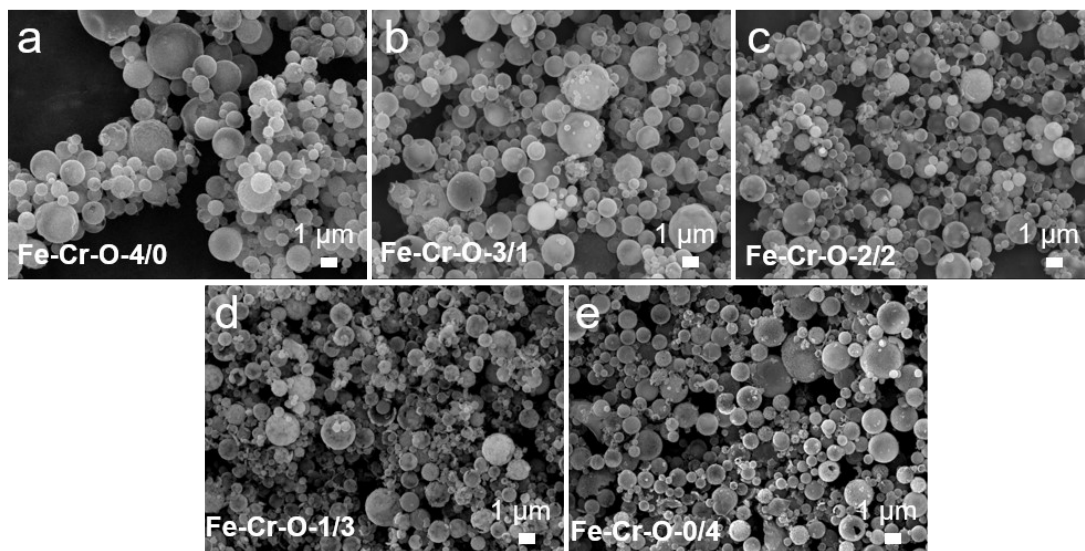

**Figure S9.** SEM images of the Fe-Cr-O HoMS prepared at 600 °C with the variation of Fe/Cr molar ratio from 4/0 to 0/4.

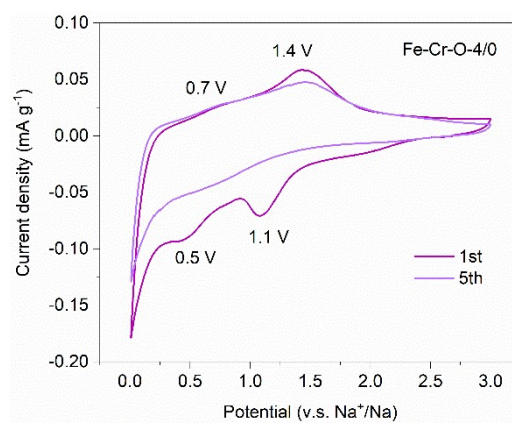

**Figure S10.** CV curves of Fe-Cr-O-4/0 HoMS.

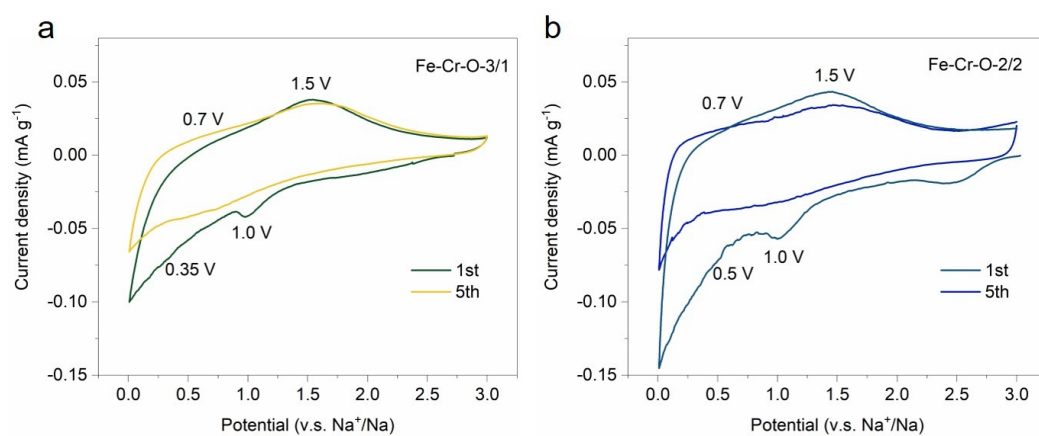

**Figure S11.** CV curves of (a) Fe-Cr-O-3/1 and (b) Fe-Cr-O-2/2 HoMS.

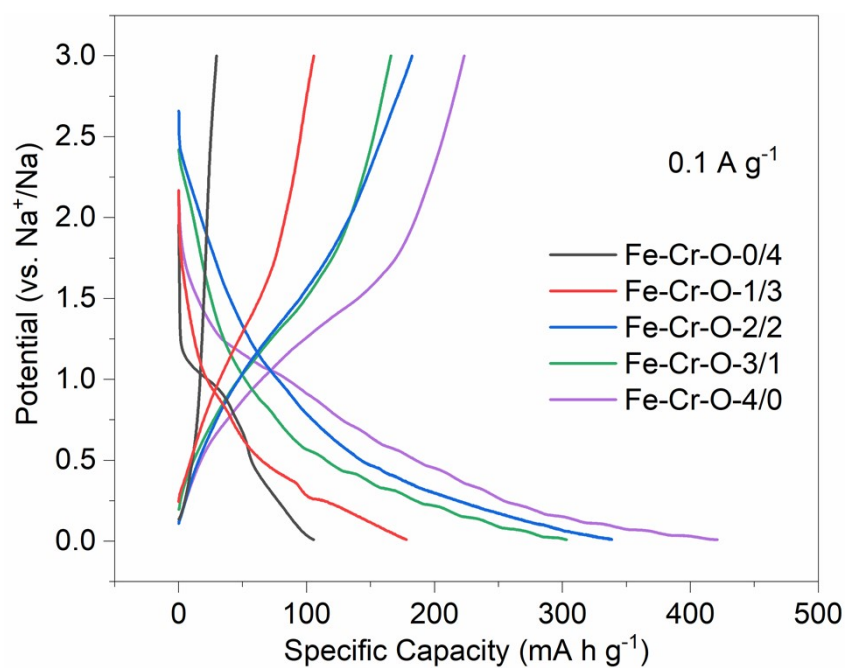

**Figure S12.** Discharge/charge curves at 0.1 A g<sup>-1</sup> for the 1<sup>st</sup> cycle.

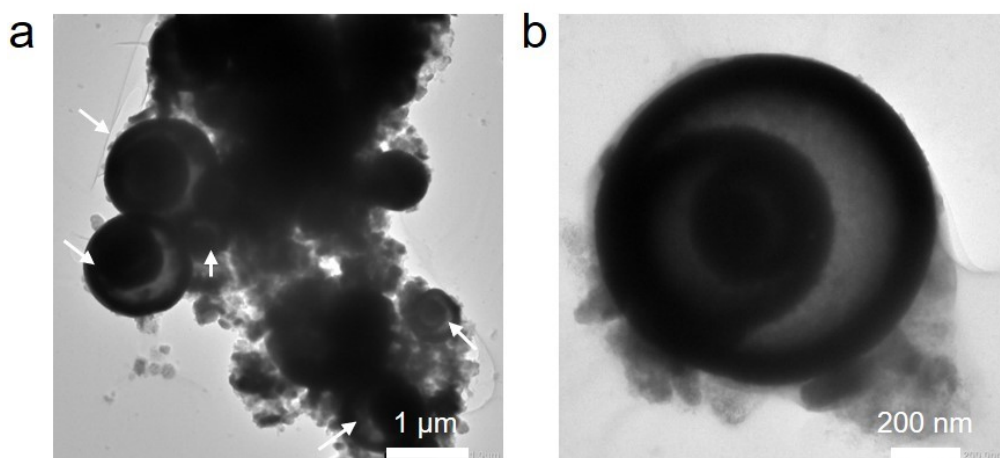

**Figure S13.** (a)-(b) TEM images of the Fe-Cr-O-2/2 HoMS after 200 times cycling at  $0.1 \text{ A g}^{-1}$ .

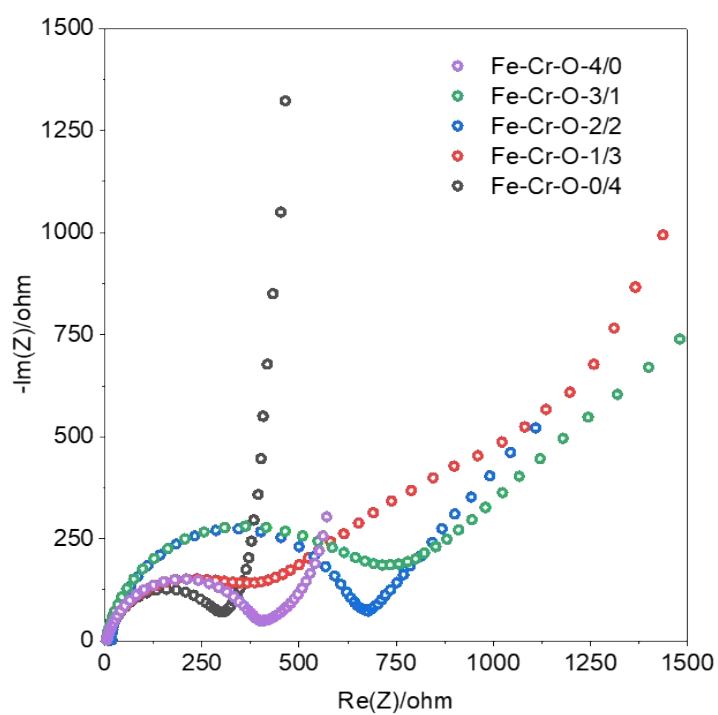

**Figure S14.** EIS spectra of the Fe-Cr-O HoMS with the variation of Fe/Cr molar ratio.

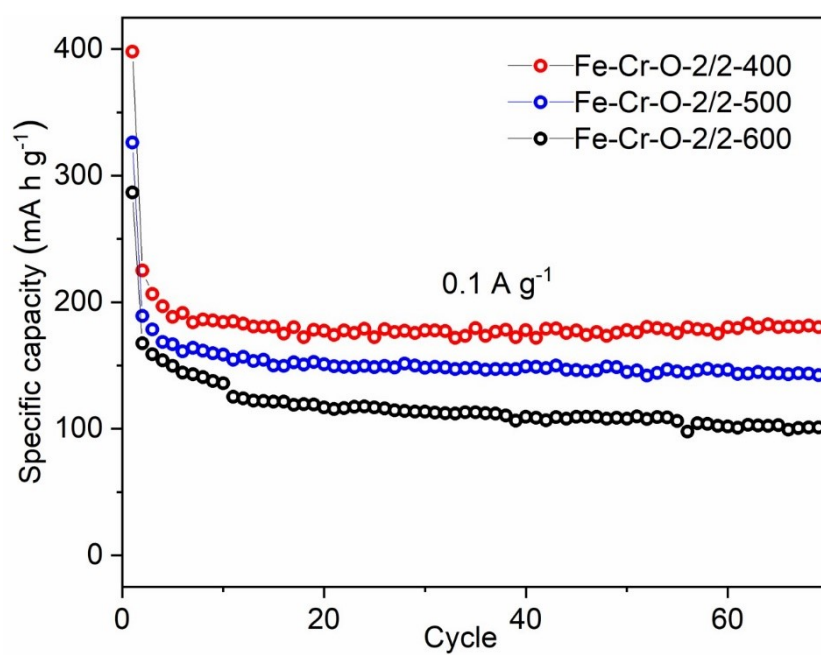

**Figure S15.** Cycling performances of the Fe-Cr-O HoMS prepared at different temperatures at  $0.1 \text{ A g}^{-1}$ .
